# Supplementary material
Source: MDPI journal article supplement (https://www.mdpi.com/2227-9717/7/7/426)
Supplement: s1 [file s1]

# Optimization of the production technology of oxidized cyclodextrin bisulfite

Yana Kostyro\*, Anastasiya Soldatenko and Alexey Levchuk

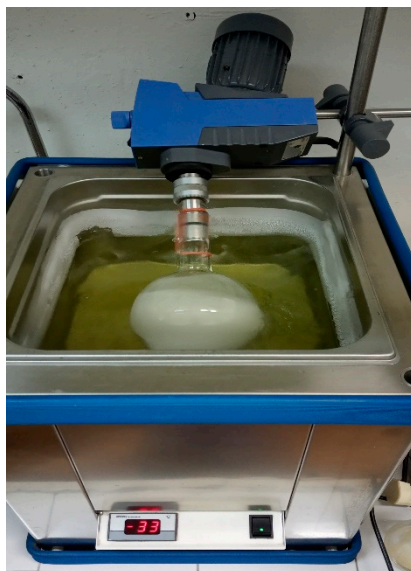

**Figure S1:** Equipment for freezing substance KS-6469 (general view)

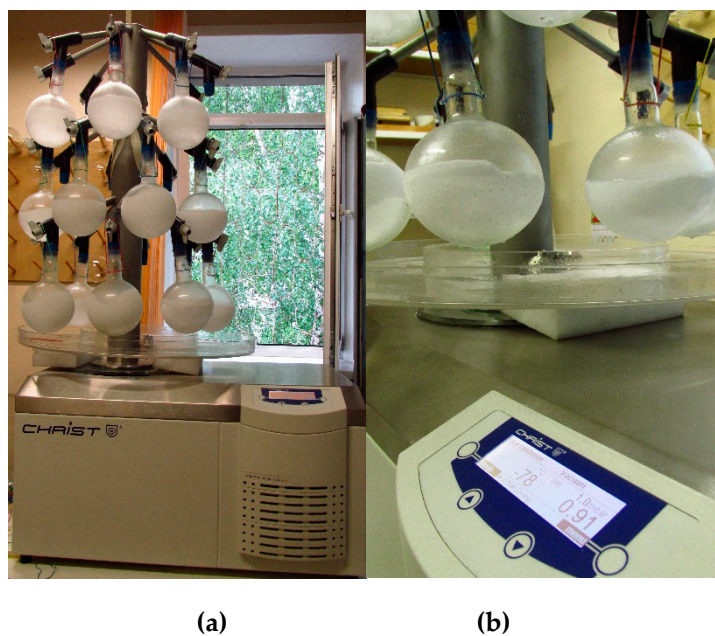

**Figure S2:** Equipment for freeze-drying of substance KS-6469: (a) General view); (b) The beginning of sublimation (a crust of ice is formed on the surface of the flask).

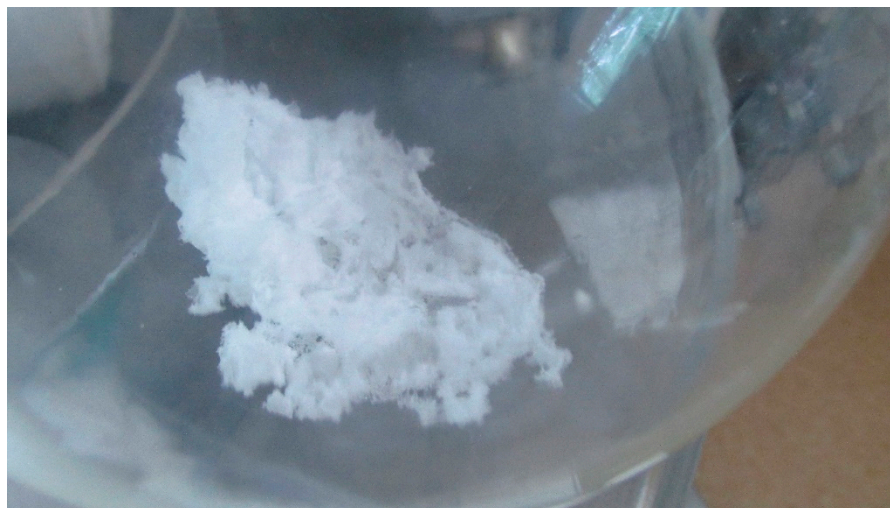

**Figure S3:** Appearance of a freeze-dried substance KS-6469

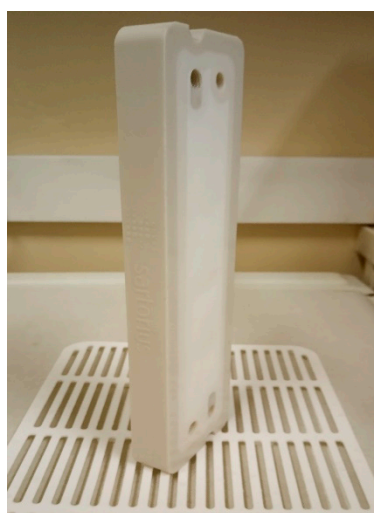

**Figure S4:** PES membrane with a filtration area of 0.1m<sup>2</sup> (general view)

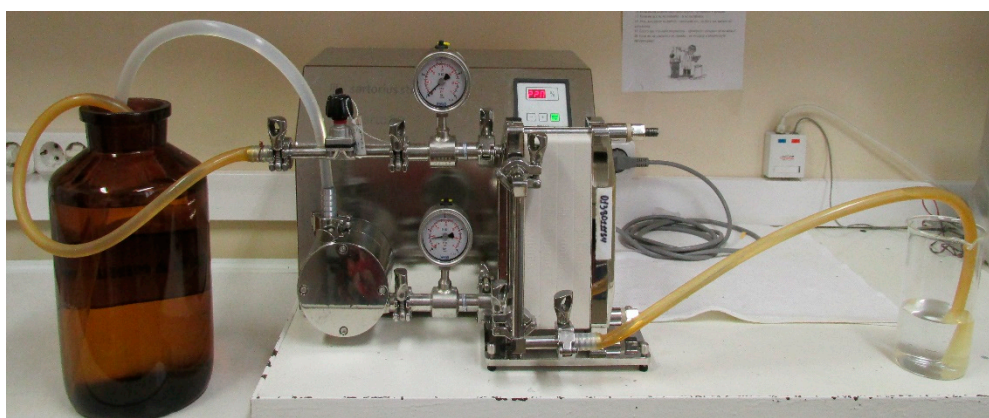

**Figure S5:** Equipment for tangential filtration of the substance solution KS-6469 (general view)
